# Supplementary material for: Chemical genetics reveals a complex functional ground state of neural stem cells
Source: Springer Nature journal article supplement (doi:10.1038/nchembio873), 2007-04-08
Supplement: nchembio873-S1.pdf [file nchembio873-S1.pdf]

# Supplementary Figure 1

**a**

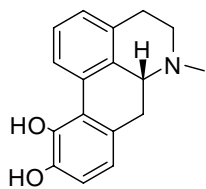

**6**  
Apomorphine  
Cluster 84  
p-value = 8.86E-30  
Target(s): DRD1a,  
DRD2, DRD4

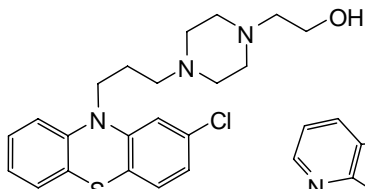

**26**  
Perphenazine  
Cluster 130  
p-value = 9.30E-29  
Target(s): DRD1a,  
DRD2, ADRA1a

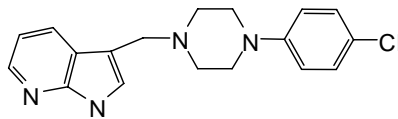

**43**  
L-745,870  
Cluster 44  
p-value = 8.86E-30  
Target(s): DRD4

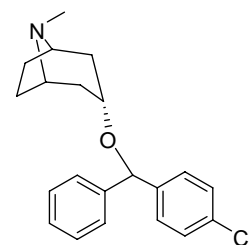

**44**  
4--Chloro-3-alpha-  
(diphenylmethoxy) tropane  
Cluster 29  
p-value = 1.98E-22  
Target(s): Reuptake Blocker

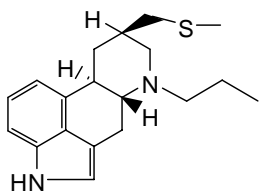

**45**  
Pergolide  
Cluster 51  
p-value = 3.95E-03  
Target(s): DRD1,  
DRD2, 5-HT2B

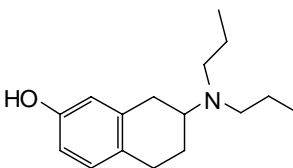

**46**  
(±)-7-Hydroxy-DPAT  
Cluster 8  
p-value = 6.12E-29  
Target(s): DRD2,  
DRD3

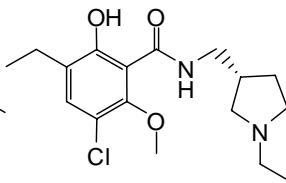

**47**  
S-(-)-Eticlopride  
Cluster 126  
p-value = 1.25E-07  
Target(s): DRD2,  
DRD3

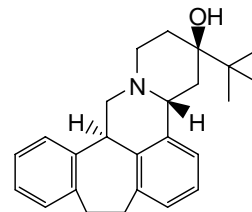

**4**  
(+)-Butaclamol  
Cluster 68  
p-value = 8.86E-30  
Target(s): DRD1/  
DRD2, NaCh, 5-HT1F

**b**

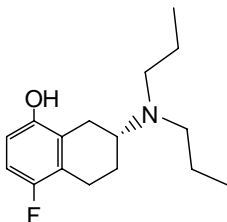

**48**  
R(+)-UH-301  
Cluster 127  
p-value = 5.92E-03  
Target(s): 5-HT1A

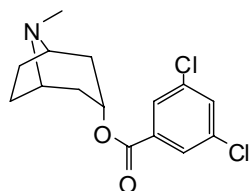

**49**  
3-Tropanyl-3,5-  
dichlorobenzoate  
Cluster 29  
p-value = 9.09E-10  
Target(s): 5-HT3

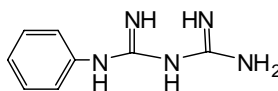

**50**  
1-Phenylbiguanide  
Cluster 136  
p-value = 3.58E-03  
Target(s): 5-HT3

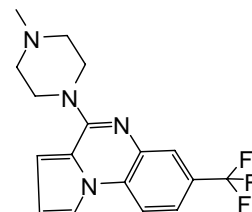

**40**  
CGS-12066A  
Cluster 71 (singleton)  
p-value = 5.01E-03  
Target(s): 5-HT1B

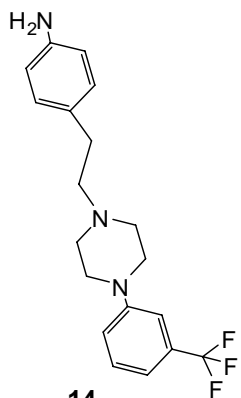

**14**  
PAPP  
Cluster 94 (singleton)  
p-value = 3.78E-27  
Target(s): 5-HT1A,  
5-HT1D, DRD2

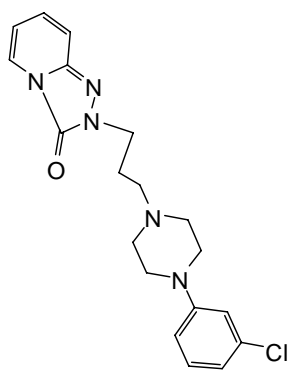

**51**  
Trazodone  
Cluster 122  
p-value = 4.10E-03  
Target(s): 5-HT2A,  
SLC6A4, SLC6A2,  
ADRA2A, HRH1

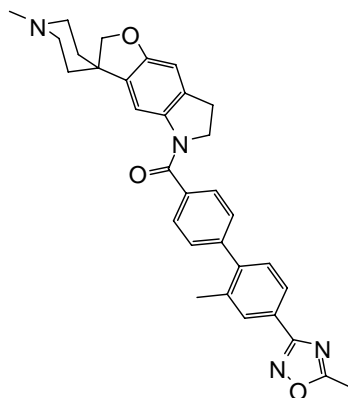

**52**  
SB 224289  
Cluster 11  
p-value = 8.52E-07  
Target(s): 5-HT1B

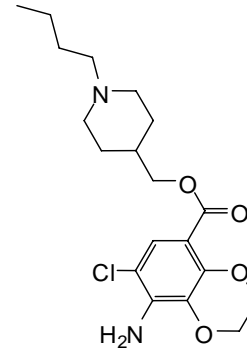

**53**  
SB 204070  
Cluster 116 (singleton)  
p-value = 1.98E-09  
Target(s): 5-HT4

**Supplementary Figure 1 | Bioactive neuromodulators display a rich intra-class chemical diversity.** (a) 8 of the 22 bioactive agents identified as dopamine signaling regulators. All 8 molecules are found in unique clusters when grouped based on 2D chemical fingerprint. A total of 10 different clusters were identified within the 22 agents known to act on the dopamine pathways. (b) 8 of the 12 bioactive agents identified as serotonin signaling regulators. All 8 molecules are found in unique clusters when grouped based on 2D chemical fingerprint. A total of 10 different clusters were identified within the 12 agents known to act on the serotonin pathway. P-value represents the original significance testing performed from the screening data. Reported drug targets displayed in this figure represents curated data published in Drugbank<sup>1</sup> and inhouse.

#### Reference

1. Wishart,D.S. *et al.* DrugBank: a comprehensive resource for in silico drug discovery and exploration. *Nucleic Acids Res.* 34, D668-D672 (2006).
